# Supplementary material for: Tanshinone IIA attenuates fluoride-induced spinal cord injury by inhibiting ferroptosis and inflammation
Source: PubMed Central journal article supplement (PMC11648119; doi:10.1016/j.heliyon.2024.e40549), 2024-11-28

**A**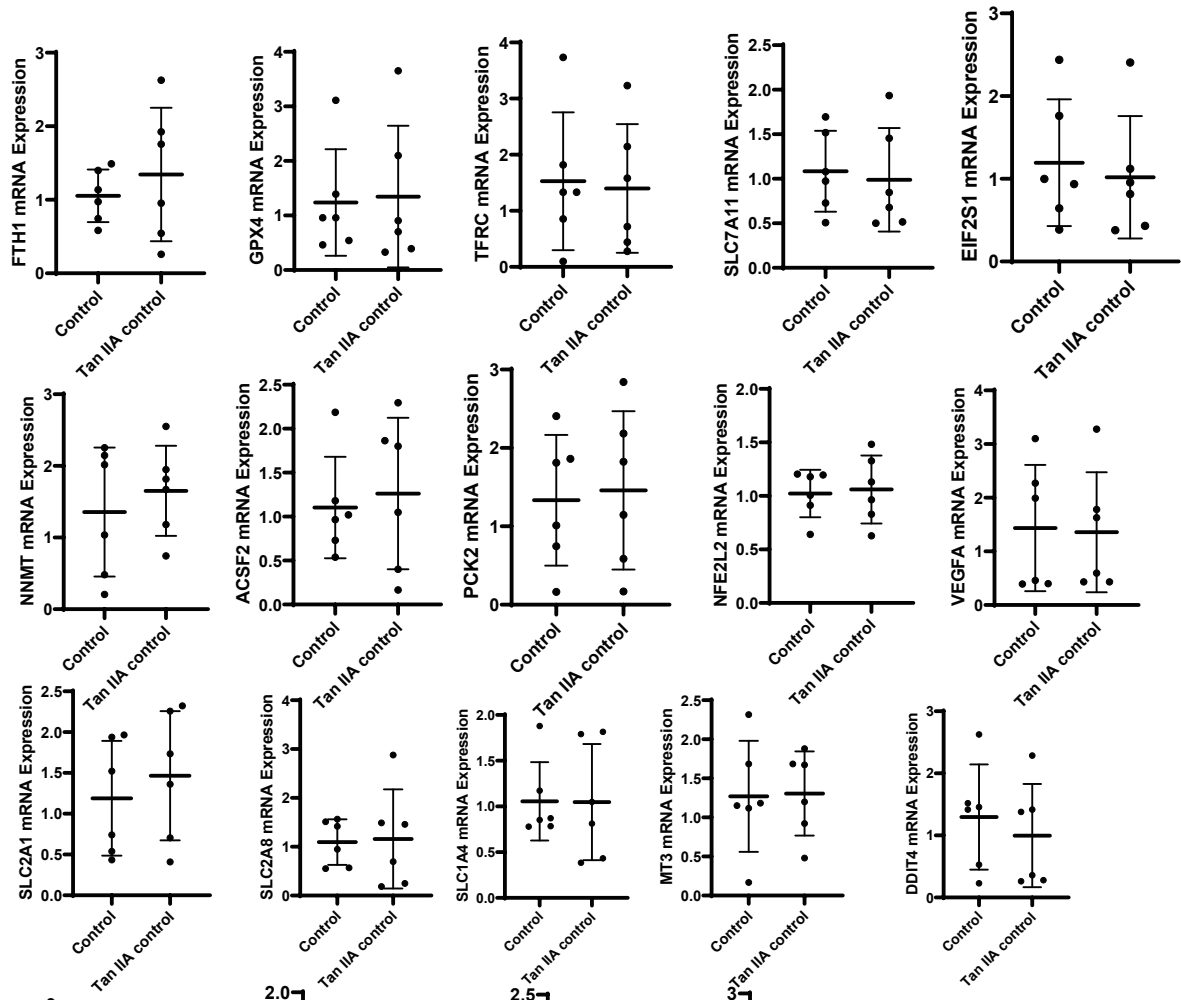**B**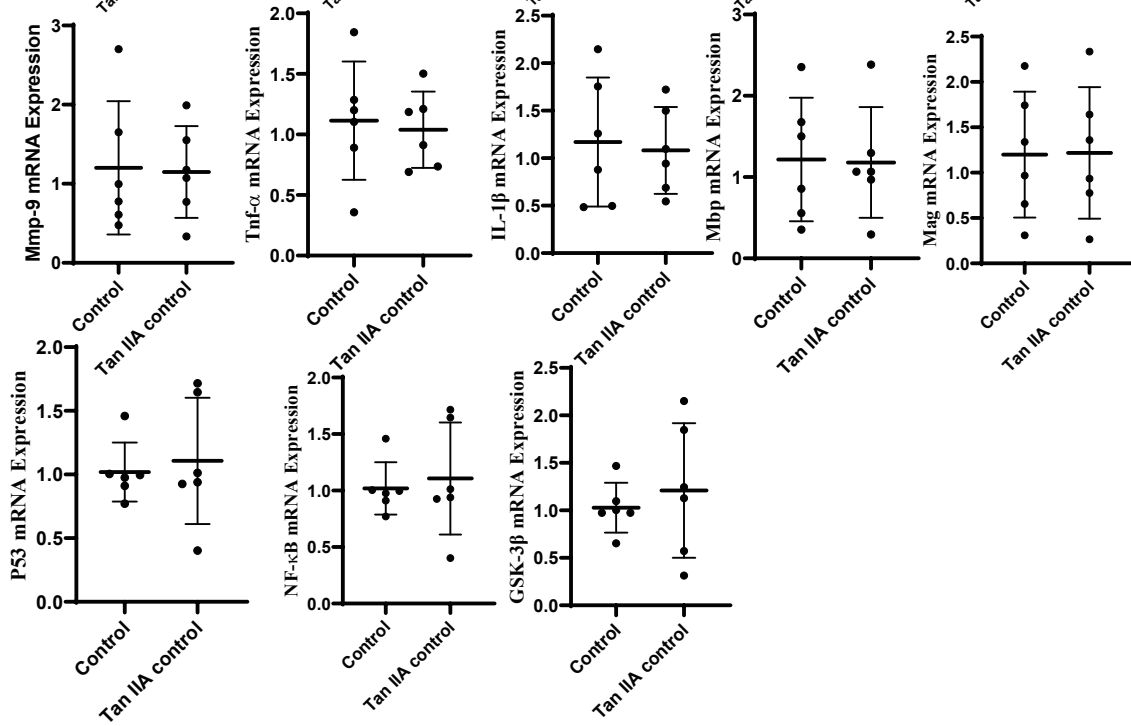**C**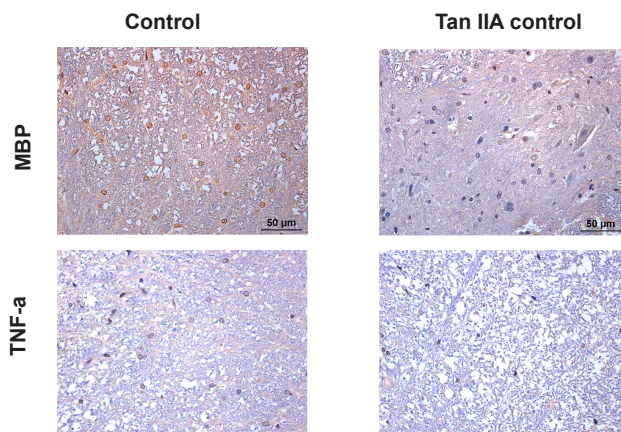

Supplement: mmc1.pdf [file mmc1.pdf]
